# Supplementary material
Source: publisher figshare collection journal article supplement (https://diabetesjournals.figshare.com/ndownloader/files/25506692)
Supplement: Supplementary file 1 [file 25506692]

Supplementary Materials

Supplement 1. Qualitative interview questions for parents/caregivers.

1. What are the main questions you have now as a family with a child who has recently been diagnosed with type 1 diabetes?
2. What concerns do you have for your child with this diagnosis?
3. Is there anything you are confused about regarding their type 1 diabetes care?
4. What information has your child’s provider and healthcare team provided that you found helpful?
5. Has there been information shared you did not find helpful?
6. Has there been information shared you found confusing?
7. Do you feel supported as you navigate this new diagnosis or do you wish you had more support?
8. What type of support do you think would be helpful for a family with a child who has recently been diagnosed with type 1 diabetes?
9. Is there anything that would be helpful for me to know that has not been mentioned yet?

Supplement 2. Parent/caregiver preferred time since T1D diagnosis to receive educational topics.

|  | **Percent of Parents’ Preferred Time since T1D Diagnosis (months)** | | | | | |
| --- | --- | --- | --- | --- | --- | --- |
| **Card Sort Items** | **1** | **3** | **6** | **9** | **12** | **N/A** |
| 2. How often a parent should check their child’s blood sugar level during the day and night | 92.3 | 0.0 | 0.0 | 0.0 | 0.0 | 7.7 |
| 4. Knowing the appropriate range for my child’s blood sugar level | 76.9 | 7.7 | 0.0 | 0.0 | 0.0 | 15.4 |
| 6. How to treat a high blood sugar level | 84.6 | 7.7 | 0.0 | 0.0 | 0.0 | 7.7 |
| 7. How to treat a low blood sugar level | 92.3 | 0.0 | 0.0 | 0.0 | 0.0 | 7.7 |
| 20. Recognizing my child's signs of have having a low blood sugar level | 84.6 | 7.7 | 0.0 | 0.0 | 0.0 | 7.7 |
| 39. What foods are appropriate for a child with T1D to eat | 92.3 | 7.7 | 0.0 | 0.0 | 0.0 | 0.0 |
| 40. How to count carbohydrates | 84.6 | 0.0 | 0.0 | 0.0 | 0.0 | 15.4 |
| 53. How and when to measure ketones | 92.3 | 0.0 | 0.0 | 0.0 | 0.0 | 7.7 |
| 49. How often will I need to bring my child to the clinic to see their provider | 84.6 | 15.4 | 0.0 | 0.0 | 0.0 | 0.0 |
| 51. How to use glucagon | 84.6 | 15.4 | 0.0 | 0.0 | 0.0 | 0.0 |
| 19. Recognizing my child's signs of have having a high blood sugar level | 69.2 | 23.1 | 0.0 | 0.0 | 0.0 | 7.7 |
| 38. The T1D management items to always keep around (e.g. What snacks to have on hand or at home to treat T1D, how many extra tests strips should we have on hand) | 69.2 | 23.1 | 0.0 | 0.0 | 0.0 | 7.7 |
| 52. What does it mean when my child’s healthcare team mentions DKA/What can I do to help my child avoid having a DKA | 69.2 | 23.1 | 0.0 | 0.0 | 0.0 | 7.7 |
| 48. Causes of T1D (e.g. family history, genetics, environment) | 69.2 | 15.4 | 0.0 | 15.4 | 0.0 | 0.0 |
| 11. Establishing consistent eating schedules | 40.0 | 26.7 | 20.0 | 0.0 | 0.0 | 13.3 |
| 13. How to generally talk to my child about diabetes | 46.2 | 38.5 | 15.4 | 0.0 | 0.0 | 0.0 |
| 24. Access to services and support networks (e.g. how to find T1D support in the community, what resources are available to help me learn how to better manage T1D) | 44.4 | 27.8 | 11.1 | 11.1 | 5.6 | 0.0 |
| 28. Application of basic T1D knowledge in daily life (e.g., example family meals, packing school lunches, eat at restaurants, road trips) | 53.8 | 38.5 | 0.0 | 0.0 | 0.0 | 7.7 |
| 33. Managing T1D when my child is sick | 61.5 | 30.8 | 7.7 | 0.0 | 0.0 | 0.0 |
| 9. Fear of night time lows and treating night time lows | 53.8 | 46.2 | 0.0 | 0.0 | 0.0 | 0.0 |
| 55. Fear of hypoglycemia when my child with T1D is physically active | 46.2 | 53.8 | 0.0 | 0.0 | 0.0 | 0.0 |
| 12. Eating a balanced diet that fits within my child’s carbohydrate needs | 40.0 | 40.0 | 13.3 | 0.0 | 0.0 | 6.7 |
| 41. What questions I should be asking my PCP when I see them | 30.8 | 38.5 | 30.8 | 0.0 | 0.0 | 0.0 |
| 8. Teaching my child strategies to manage his/her anxiety/fear about T1D management tasks | 23.5 | 41.2 | 23.5 | 5.9 | 5.9 | 0.0 |
| 10. Managing picky eating or noncompliance at meal times | 23.1 | 46.2 | 7.7 | 0.0 | 0.0 | 23.1 |
| 16. How to educate teachers, extended family, and friends about T1D (e.g. teaching other adults to manage my child’s blood sugar) | 30.8 | 53.8 | 15.4 | 0.0 | 0.0 | 0.0 |
| 18. Balancing T1D self-care with daily life | 38.5 | 46.2 | 15.4 | 0.0 | 0.0 | 0.0 |
| 22. Addressing my feelings of grief, hopelessness, guilt, helplessness, lonely/isolation | 16.7 | 33.3 | 11.1 | 16.7 | 11.1 | 11.1 |
| 23. Building confidence in my ability to manage daily T1D tasks | 6.7 | 46.7 | 20 | 6.7 | 13.3 | 6.7 |
| 32. Managing disruption to family patterns and parent-child relationship | 17.6 | 29.4 | 17.6 | 17.6 | 11.8 | 5.9 |
| 37. What to do when children are having difficulty sleeping | 6.3 | 37.5 | 18.8 | 6.3 | 6.3 | 25 |
| 44. What T1D tasks everyone in the family can help with | 7.7 | 46.2 | 23.1 | 15.4 | 0.0 | 7.7 |
| 45. When to ask about devices (e.g. CGM, insulin pump) and that may be right for my child | 15.4 | 61.5 | 23.1 | 0.0 | 0.0 | 0.0 |
| 50. What impacts my child’s HbA1C value and what range should my child’s HbA1C be in | 30.8 | 46.2 | 7.7 | 7.7 | 0.0 | 7.7 |
| 54. What types of activities are best for my child with T1D to be physically active | 23.5 | 58.8 | 5.9 | 5.9 | 5.9 | 0.0 |
| 46. Addressing parent diabetes-related distress | 29.4 | 17.6 | 29.4 | 5.9 | 17.6 | 0.0 |
| 3. How and when to appropriately transition T1D tasks to my child | 11.8 | 17.6 | 35.3 | 11.8 | 17.6 | 5.9 |
| 14. Teaching my child how to talk to their peers about diabetes | 14.3 | 23.8 | 33.3 | 19 | 9.5 | 0.0 |
| 15. Managing my concerns about leaving my child in the care of others | 17.6 | 23.5 | 35.3 | 11.8 | 5.9 | 5.9 |
| 17. Trusting other adults to manage my child's blood sugar | 6.3 | 25 | 43.8 | 18.8 | 6.3 | 0.0 |
| 21. Learning strategies to help manage my concerns about long-term T1D complications | 11.8 | 11.8 | 47.1 | 11.8 | 17.6 | 0.0 |
| 29. Refreshers on basic T1D management (e.g., carbohydrate counting) | 7.7 | 15.4 | 30.8 | 7.7 | 38.5 | 0.0 |
| 36. How to manage sibling tension regarding T1D | 11.8 | 17.6 | 41.2 | 5.9 | 5.9 | 17.6 |
| 42. How to handle parent T1D management burn out | 15.4 | 7.7 | 38.5 | 15.4 | 15.4 | 7.7 |
| 43. How to handle child T1D management burn out | 11.8 | 11.8 | 47.1 | 17.6 | 5.9 | 5.9 |
| 47. Ways to help with marital distress while caring for a child with T1D | 11.8 | 5.9 | 41.2 | 11.8 | 17.6 | 11.8 |
| 1. Fostering open family communication surrounding T1D management (e.g., child feeling comfortable telling me about highs/lows) | 30.8 | 23.1 | 38.5 | 0.0 | 0.0 | 7.7 |
| 31. Introducing/helping my child adjust to new treatments (e.g., insulin pumps, CGM) | 38.5 | 30.8 | 30.8 | 0.0 | 0.0 | 0.0 |
| 27. How to integrate T1D management into typical developmental activities (e.g., sleepovers, summer camp, school field trips) | 23.1 | 30.8 | 30.8 | 15.4 | 0.0 | 0.0 |
| 5. Managing misbehaviors/noncompliance surrounding diabetes self-care and management tasks | 23.5 | 29.4 | 23.5 | 11.8 | 5.9 | 5.9 |
| 26. Talking to my child’s T1D team about health-related concerns | 29.4 | 29.4 | 23.5 | 11.8 | 5.9 | 0.0 |
| 35. Maintaining/achieving good T1D self-care routines during major transition periods (e.g., starting kindergarten or middle school) | 17.6 | 29.4 | 23.5 | 11.8 | 5.9 | 11.8 |
| 25. Information about recent T1D treatments and technologies | 14.3 | 23.8 | 33.3 | 14.3 | 14.3 | 0.0 |
| 30. T1D interfering with fostering my child’s autonomy | 7.7 | 30.8 | 23.1 | 15.4 | 15.4 | 7.7 |
| 34. Balancing the attention I give to my child with T1D and other relationships (e.g., spouse, other children) | 6.3 | 25 | 31.3 | 18.8 | 18.8 | 0.0 |
| Note. The number by each item reflect the numerical order in which parents received the item during the card sorting task, while the percentages on the right reflect the percent of parents/caregivers who sorted the item into each monthly bucket. N/A = never/not relevant | | | | | | |
